# Supplementary material
Source: PubMed Central journal article supplement (PMC4779667)
Supplement: NIHMS750713-supplement-1.pdf [file NIHMS750713-supplement-1.pdf]

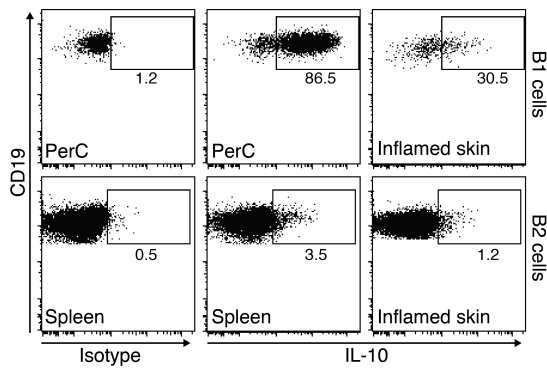

**Supplemental Figure 1.** Skin B1 cells make IL-10. IL-10 detection by intracellular staining after 4-h polyclonal stimulation of B cells from WT mice with CFA-induced chronic skin inflammation. Cells are gated on B1 cells (L/D Aqua<sup>-</sup>CD45<sup>+</sup>CD19<sup>+</sup>CD43<sup>+</sup>B220<sup>lo/-</sup>) and B2 cells (L/D Aqua<sup>-</sup>CD45<sup>+</sup>CD19<sup>+</sup>CD43<sup>-</sup>B220<sup>+</sup>). One representative staining of 3 analyzed mice is shown. PerC, peritoneal cavity.
